# Supplementary material
Source: HighWire-hosted journal article supplement (https://bmjopen.bmj.com/content/15/5/e099662)
Supplement: inline-supplementary-material-5 [file inline-supplementary-material-5.pdf]

Supplementary file 5: Table: Overview of clinical utility and reliability/validity data of included measurement instruments for post-stroke dysarthria

| Name of screening measurement instrument & related papers           | Total participants & diagnosis     | Feasible to use clinically <sup>a</sup>                                                                                                                                                                                                                                                                                                                                                                                                                                                          | Validity & Reliability data <sup>b</sup>                                                                                                                                                                                                                                                                                                                                                                                                                                                                                                                                                                                                                                                                       | Quality of evidence <sup>c</sup>                                                     |
|---------------------------------------------------------------------|------------------------------------|--------------------------------------------------------------------------------------------------------------------------------------------------------------------------------------------------------------------------------------------------------------------------------------------------------------------------------------------------------------------------------------------------------------------------------------------------------------------------------------------------|----------------------------------------------------------------------------------------------------------------------------------------------------------------------------------------------------------------------------------------------------------------------------------------------------------------------------------------------------------------------------------------------------------------------------------------------------------------------------------------------------------------------------------------------------------------------------------------------------------------------------------------------------------------------------------------------------------------|--------------------------------------------------------------------------------------|
| Maximum phonation time (MPT) and maximum repetition rate (MRR) (25) | n=130 participants<br>Stroke=26    | <ul style="list-style-type: none"> <li>No specific training</li> <li>One clinician needed to understand and interpret the findings</li> <li>Aphasia accessible</li> <li>Few minutes</li> <li>Aphasia accessible</li> <li>No purchase required</li> </ul>                                                                                                                                                                                                                                         | <p>Reported as an unreliable measure from the data available.</p> <p>MPR – low sensitivity of 0.58 and specificity of 0.92</p> <p>MPT sensitivity values (proportion of true positives) were 0.05 showing useless as a diagnostic marker of speech impairment</p> <p>True negatives (specificity) were 1.0 for MPT</p>                                                                                                                                                                                                                                                                                                                                                                                         | Very low due to small numbers of participants after stroke <30                       |
| Name of diagnostic measurement instrument                           | Total participants & diagnosis     | Feasible to use clinically <sup>a</sup>                                                                                                                                                                                                                                                                                                                                                                                                                                                          | Validity & Reliability data <sup>b</sup>                                                                                                                                                                                                                                                                                                                                                                                                                                                                                                                                                                                                                                                                       | Quality of evidence <sup>c</sup>                                                     |
| Assessment of intelligibility of dysarthric Speech AIDS (40)        | n=9<br>Mix of CVA and TBI combined | <ul style="list-style-type: none"> <li>No specific training required.</li> <li>Clinician would be required to carry out due to transcription.</li> <li>2 people needed - examiner and judge who rates recorded samples</li> <li>Time taken not specified, includes 220 words to be transcribed, 50 word sample, 22 sentences</li> <li>Not aphasia accessible</li> <li>Easy to locate online for commercial purchase £ 154.80+ for assessment - add on cost of microphone and recorder</li> </ul> | <p>Reliability of single words Intra-judge Person product moment correlations (r) were .90 (multiple choice) and .87 (transcription)</p> <p>Interjudge – no difference with multiple choice format (F=1.50, df 4, 32)</p> <p>Significant difference transcription format (F=4.2, df 4, 32; p&gt;0.01)</p> <p>Sentences:</p> <p>Interjudge – no significant difference between 4 judges intelligible speech and rate of intelligible speech (F=.39 and 2.69 respectively df 3, 30)</p> <p>Coefficients range from .93 to .99 for intelligibility and .99 for rate of intelligible speech.</p> <p>Intrajudge correlations range from .96 to .99 for intelligibility and .99 for rate of intelligible speech.</p> | Very low <30<br>Due to small number of participants involved in psychometric testing |

|                                                                                                              |                                           |                                                                                                                                                                                                                                                                                                                                                                                                         |                                                                                                                                                                                                                                                                                                                                                                                                                                                                                                                                                                                                                                                                                                                          |                                                                |
|--------------------------------------------------------------------------------------------------------------|-------------------------------------------|---------------------------------------------------------------------------------------------------------------------------------------------------------------------------------------------------------------------------------------------------------------------------------------------------------------------------------------------------------------------------------------------------------|--------------------------------------------------------------------------------------------------------------------------------------------------------------------------------------------------------------------------------------------------------------------------------------------------------------------------------------------------------------------------------------------------------------------------------------------------------------------------------------------------------------------------------------------------------------------------------------------------------------------------------------------------------------------------------------------------------------------------|----------------------------------------------------------------|
| Frenchay Dysarthria Assessment 2 <sup>nd</sup> Edition (27, 72-75)<br>Pending unpublished data from authors. | n=26 total<br>n=4 CVA                     | <ul style="list-style-type: none"> <li>No specific training to use test</li> <li>Single clinician needed with training as a speech and language therapist</li> <li>Able to interpret results</li> <li>No time given for time to carry out</li> <li>Some parts aphasia accessible but some reading required or words and sentences</li> <li>Easy to source for purchase</li> <li>Cost £199.14</li> </ul> | <p>No numerical results reported for stroke specific data in manual</p> <p>Psychometric data available for other non-stroke conditions</p> <p>Interjudge reliability as reported in the FDA (Enderby, 1983) test manual ranged from .79 to .92. Spearman's <math>r</math> correlation revealed moderate to high intrajudge reliability (<math>r_s = .85, .87, .90</math>).</p> <p>Interjudge reliability for the FDA as determined by Spearman's <math>r</math> correlation revealed moderate reliability among the three judges, with <math>r_s = .72, .72</math>, and <math>.77</math>, <math>p &lt; .01</math>.</p> <p>FDA reliability of scores within listener reliability score 0.88 and between listener 0.68</p> | Very low due to small numbers of participants after stroke <30 |
| Iowa Oral Performance Instrument (76)                                                                        | n=18 total<br>n=3 CVA                     | <ul style="list-style-type: none"> <li>No specific training</li> <li>One clinician needed to understand and interpret the findings</li> <li>Aphasia accessible</li> <li>No time given as this will vary according to use</li> <li>Sourced quickly online to purchase</li> <li>No definitive prices shown, price on application online estimation \$1200-\$2000 &amp; single use tongue bulbs</li> </ul> | <p>No data on validity of reliability of this instrument as a measure of dysarthria.</p> <p>Test-re-test reliability of objective measure only (<math>F(1,12) = 6.83</math>, <math>p = .023</math>)</p>                                                                                                                                                                                                                                                                                                                                                                                                                                                                                                                  | Unknown as no relevant data                                    |
| Reading passages out loud to judge motor speech (29, 77, 78)                                                 | n=15 total<br>n=9 CVA                     | <ul style="list-style-type: none"> <li>No specific training</li> <li>One clinician needed to understand and interpret the findings</li> <li>Not aphasia accessible reading required</li> <li>Time taken to read passage and interpret but no time specified</li> <li>No purchase required</li> </ul>                                                                                                    | <p>No data on validity of reliability of this instrument as a measure of dysarthria.</p> <p>Analysis of the passage itself rather than the validity &amp; reliability of using this to assess dysarthria</p>                                                                                                                                                                                                                                                                                                                                                                                                                                                                                                             | Unknown as no relevant data                                    |
| <b>Name of outcome measurement</b>                                                                           | <b>Total participants &amp; diagnosis</b> | <b>Feasible to use clinically<sup>a</sup></b>                                                                                                                                                                                                                                                                                                                                                           | <b>Validity &amp; Reliability data<sup>b</sup></b>                                                                                                                                                                                                                                                                                                                                                                                                                                                                                                                                                                                                                                                                       | <b>Quality of evidence<sup>c</sup></b>                         |

| instrument patient report                                                                                                      |                                                        |                                                                                                                                                                                                                                                                                        |                                                                                                                                                                                                                                                                                                     |                                                                                                                                              |
|--------------------------------------------------------------------------------------------------------------------------------|--------------------------------------------------------|----------------------------------------------------------------------------------------------------------------------------------------------------------------------------------------------------------------------------------------------------------------------------------------|-----------------------------------------------------------------------------------------------------------------------------------------------------------------------------------------------------------------------------------------------------------------------------------------------------|----------------------------------------------------------------------------------------------------------------------------------------------|
| Communication Outcomes After Stroke Scale (COAST) (30, 35)                                                                     | n=102 CVA aphasia and/or dysarthria<br>n=30 dysarthria | <ul style="list-style-type: none"> <li>No specific training</li> <li>Could be introduced to patient by anyone</li> <li>Suggested completion time of 20-25 mins</li> <li>Aphasia accessible</li> <li>Quickly located online to obtain</li> <li>Free of charge on application</li> </ul> | A revised scale of 20 items was produced, demonstrating good internal consistency and test-retest reliability ( $\alpha=0.83-0.92$ ; ICC=0.72–0.88).<br>Not designed to be repeated so no measure of responsiveness                                                                                 | Moderate due to participant numbers $\geq 100$ patients ( $\geq 30$ dysarthria)<br>Numerical data showing reliability & internal consistency |
| The Communicative Participation Item Bank (CPIB): item bank calibration and development of a disorder-generic short form. (79) | n=141<br>n= 18 CVA                                     | <ul style="list-style-type: none"> <li>No specific training</li> <li>Could be introduced to patient by anyone</li> <li>Aphasia accessible with support</li> <li>No suggested completion time</li> <li>Easily accessible from publication</li> </ul>                                    | No data on validity of reliability of this instrument as a measure of post-stroke dysarthria.<br>The do report a significant effect of different diagnosis on communicative participation with large effect size: $F(3, 131) = 5.97, p = .001, r^2 = .14$ .                                         | Very low due to small numbers of participants after stroke<30                                                                                |
| Dysarthria Impact Profile (32)                                                                                                 | n=31<br>n=7 CVA                                        | <ul style="list-style-type: none"> <li>No specific training</li> <li>Could be introduced to patient by anyone</li> <li>Not Aphasia accessible requires reading</li> <li>No suggested completion time</li> <li>Easily accessible from publication</li> </ul>                            | Internal consistency with values above 0.8 for Cronbach's $\alpha$<br>Overall Intra-rater reliability strong for all sections of scale with pearson's correlation for all sections. Validity showed strong correlations between the sets of scores $r=0.683, p<0.01$                                | Very low due to small numbers of participants after stroke<30                                                                                |
| Questionnaire on Acquired Speech Disorders (33)                                                                                | n=55<br>n=1 CVA                                        | <ul style="list-style-type: none"> <li>No specific training</li> <li>Could be introduced to patient by anyone</li> <li>Not Aphasia accessible requires reading</li> <li>No suggested completion time</li> <li>Easily accessible from publication</li> </ul>                            | No data on validity of reliability of this instrument as a measure of dysarthria.<br>Data given on association with the Communication Profile scores for each participant. Reported relatively high association ( $r_s=0.683, p\leq 0.01$ ). Correlations are generally moderate to high (0.4-0.7). | Very low due to small numbers of participants after stroke<30                                                                                |
| Quality of Life for Dysarthric Speakers QOL-DyS (34)                                                                           | n=50<br>n=7 CVA                                        | <ul style="list-style-type: none"> <li>No specific training</li> <li>Could be introduced to patient by anyone</li> <li>Not Aphasia accessible requires reading</li> </ul>                                                                                                              | Overall Cronbach's coefficient reported as excellent $\alpha = 0.90$ .<br>Intraclass correlation coefficient for the overall QOL-DyS score was 0.98 with 95% confidence interval from 0.97 to 0.99.                                                                                                 | Very low due to small numbers of participants after stroke<30                                                                                |

|                                                                                                                              |                                                        | <ul style="list-style-type: none"> <li>No suggested completion time</li> <li>Easily accessible from publication</li> </ul>                                                                                                                                                                                                                                                                      |                                                                                                                                                                                                                                                                                                                                                                                                                                                                                                                                                                                                                                                                                                            |                                                                                                                                 |
|------------------------------------------------------------------------------------------------------------------------------|--------------------------------------------------------|-------------------------------------------------------------------------------------------------------------------------------------------------------------------------------------------------------------------------------------------------------------------------------------------------------------------------------------------------------------------------------------------------|------------------------------------------------------------------------------------------------------------------------------------------------------------------------------------------------------------------------------------------------------------------------------------------------------------------------------------------------------------------------------------------------------------------------------------------------------------------------------------------------------------------------------------------------------------------------------------------------------------------------------------------------------------------------------------------------------------|---------------------------------------------------------------------------------------------------------------------------------|
| Name of outcome measurement instrument therapist report                                                                      | Total participants & diagnosis                         | <ul style="list-style-type: none"> <li>Feasible to use clinically<sup>a</sup></li> </ul>                                                                                                                                                                                                                                                                                                        | Validity & Reliability data <sup>b</sup>                                                                                                                                                                                                                                                                                                                                                                                                                                                                                                                                                                                                                                                                   | Quality of evidence <sup>c</sup>                                                                                                |
| OHW (O'Halloran, Hickson & Worrall) Scales for speech, language and cognitive communication rating scales (43)               | n=38 total<br>n=11 dysarthria<br>CVA                   | <ul style="list-style-type: none"> <li>Need to have carried out the IFCI</li> <li>May need to be familiar with IFCI, International Classification of Functioning and Health and OHW scales</li> <li>Experienced clinician</li> <li>No time for completion given</li> <li>Suitable for people with dysarthria and aphasia</li> <li>No purchase required, version in published article</li> </ul> | Strong and significant concurrent criterion validity and significant interrater reliability<br>Interrater agreement was moderately high for the OHW speech and cognitive communicative scales but low for the OHW language scale. Interrater agreement on the OHW language scale requires further investigation.<br>Speech – absolute agreement on rating 70.8% weighted kappa .837<br>Speech concurrent validity with standardised measure (AIDS) .82                                                                                                                                                                                                                                                     | Very low due to small numbers of participants with dysarthria after stroke <30                                                  |
| Therapy Outcome Measures<br><br>(38, 80) Rating Conversations using the Therapy Outcome Measure (TOM) for aphasia/dysarthria | n=102 CVA aphasia and/or dysarthria<br>n=30 dysarthria | <ul style="list-style-type: none"> <li>Training not mandatory but recommended</li> <li>Clinician with expertise in that condition to judge</li> <li>Few minutes completion time</li> <li>Aphasia accessible</li> <li>Quickly located online to obtain the full manual £39.49</li> </ul>                                                                                                         | The manual indicates the Hesketh paper:<br>The intra-rater agreement was high: 93% of ratings were within a half point of each other on the TOM scale.<br>The intra class correlation (ICC) for intra-rater agreement was 0.92(Hesketh et al.,2008).-<br>Inter-rater agreement was slightly lower with 77% of ratings within a half point on the 11-point scale; ICC was 0.83(Hesketh et al.,2008).<br>Conversation reliability was equally good; 78% of the ratings were within a half point, with ICC being 0.82 (Hesketh et al., 2008: two videotaped interviews were conducted over a 2-week period.<br>All three comparisons (0.82-0.92) are well above commonly accepted levels for reliability data | Moderate due to participant numbers ≥100 patients (≥30 dysarthria)<br>Numerical data showing reliability & internal consistency |

- a- **Clinical utility: Training to use, training to interpret, people needed to carry out, completion time, accessible to people with aphasia, commercial availability and cost**
- b- **Validity data and reliability data as reported**
- c- **High** - Consistent findings in multiple studies of at least good quality OR one study of excellent quality AND a total sample size of  $\geq 100$  patients; **Moderate** - Conflicting findings in multiple studies of at least good quality OR consistent findings in multiple studies of at least fair quality OR one study of good quality AND a total sample size of  $\geq 50$  patients; **Low** - Conflicting findings in multiple studies of at least fair quality OR one study of fair quality AND a total sample size of  $\geq 30$  patients; **Very low** - Only studies of poor quality OR a total sample size of  $< 30$  patients; **Unknown** no studies (Prinsen ref 2016).
